# Supplementary material
Source: PubMed Central journal article supplement (PMC6976782)
Supplement: BPH-177-161-s001.pdf [file BPH-177-161-s001.pdf]

**Table S1: Characteristics of PH Group-III patients (in vitro study)**

| Age | Sexe | mPAP<br>(mmHg) | FEV<br>(ml) | FEV<br>(%) | FVC<br>(ml) | Underlying diagnosis                 |
|-----|------|----------------|-------------|------------|-------------|--------------------------------------|
| 59  | M    | 28             | 2340        | 70         | 2910        | pulmonary fibrosis                   |
| 49  | M    | 42             | 702         | 19         | 2200        | COPD, emphysema, bron. dilatation    |
| 45  | M    | 31             | 910         | 24         | 2270        | COPD, emphysema                      |
| 48  | F    | 24             | 450         | 17         | 920         | COPD, emphysema                      |
| 58  | M    | 23             | 2100        | 57         | 2320        | pulmonary fibrosis                   |
| 60  | M    | 20             | 1240        | 35         | 1420        | pulmonary fibrosis                   |
| 55  | F    | 41             | 390         | 20         | 980         | emphysema                            |
| 61  | M    | 27             | 1360        | 50         | 1770        | pulmonary fibrosis                   |
| 59  | M    | 34             | 830         | 25         | 2550        | COPD, emphysema                      |
| 50  | F    | 24             | 720         | 31         | 950         | pulmonary fibrosis, bron. dilatation |
| 59  | M    | 41             | 1690        | 52         | 2594        | pulmonary fibrosis, emphysema        |
| 50  | F    | 20             | 840         | 32         | 1970        | emphysema, bron. dilatation          |
| 65  | M    | 32             | 530         | 17         | 1656        | COPD, emphysema                      |
| 63  | F    | 31             | 740         | 37         | 1640        | emphysema                            |
| 32  | M    | 41             | 740         | 19         | 1390        | emphysema, bron. dilatation          |
| 19  | F    | 24             | 410         | 15         | 970         | bron. dilatation                     |
| 64  | M    | 27             | 3020        | 93         | 3740        | pulmonary fibrosis                   |
| 61  | F    | 24             | 460         | 19         | 2100        | emphysema                            |
| 45  | F    | 38             | 780         | 28         | 880         | pulmonary fibrosis                   |
| 66  | M    | 30             | 630         | 23         | 1850        | COPD, emphysema                      |
| 54  | M    | 22             | 570         | 67         | 1629        | COPD, emphysema                      |
| 66  | M    | 26             | 630         | 20         | 1800        | COPD, emphysema                      |

mPAP: mean pulmonary arterial pressure, FEV: Forced expiratory volume, FVC: forced vital capacity, COPD: Chronic obstructive pulmonary disease, bron.: bronchial. PGI<sub>2</sub> analogues treatments were not used.

**Table S2: Characteristics of control patients (in vitro study)**

| <b>Age</b> | <b>Sexe</b> | <b>FEV<br/>(ml)</b> | <b>FEV (%)</b> | <b>Pathology</b>             |
|------------|-------------|---------------------|----------------|------------------------------|
| 65         | M           | 2800                | 100            | lung cancer                  |
| 79         | M           | 2320                | 86             | lung cancer, emphysema       |
| 53         | M           | 7000                | 112            | lung cancer                  |
| 45         | F           | 2620                | 87             | lung cancer                  |
| 70         | F           |                     | 57             | lung cancer, COPD            |
| 71         | F           |                     |                | lung cancer, fibrosis        |
| 55         | M           | 3000                | 86             | lung cancer                  |
| 62         | M           |                     | 134            | lung cancer                  |
| 67         | M           | 2360                | 87             | lung cancer                  |
| 74         | M           | 1250                | 83             | lung cancer                  |
| 39         | F           |                     | 107            | lung cancer                  |
| 65         | F           | 1790                | 90             | lung cancer                  |
| 68         | M           | 2100                | 75             | lung cancer                  |
| 76         | F           | 1400                | 79             | lung cancer                  |
| 81         | M           | 1700                | 82             | lung cancer, COPD, emphysema |
| 72         | M           | 2480                | 87             | lung cancer, COPD            |
| 70         | M           | 1640                | 90             | emphysema                    |
| 79         | F           | 1820                | 92             | lung cancer                  |
| 65         | F           |                     |                | lung cancer, fibrosis        |
| 57         | F           |                     |                | lung cancer                  |
| 51         | M           | 1780                | 96             | lung cancer                  |
| 71         | M           | 1920                | 85             | lung cancer                  |
| 68         | M           | 2320                | 76             | lung cancer                  |
| 48         | M           | 2140                | 78             | lung cancer                  |
| 59         | M           | 2003                | 68             | lung cancer, COPD            |
| 37         | M           |                     |                | lung cancer                  |
| 63         | M           | 2010                | 61             | lung cancer, COPD            |
| 66         | F           | 2120                | 107            | lung cancer                  |
| 61         | F           | 1770                | 63             | lung cancer, COPD            |
| 67         | M           |                     |                | Donor                        |
| 63         | M           | 1720                | 79             | lung cancer, COPD            |
| 60         | M           | 2140                | 77             | lung cancer                  |
| 75         | M           | 1710                | 60             | lung cancer, COPD            |
| 57         | M           | 3160                | 80             | lung cancer                  |
| 77         | F           | 1650                | 74             | lung cancer, COPD            |
| 60         | M           | 2300                | 65             | lung cancer, COPD            |
| 62         | M           | 1450                | 49             | lung cancer, COPD            |
| 67         | M           | 2870                | 80             | lung cancer, COPD            |
| 64         | F           |                     |                | lung cancer                  |

FEV: Forced expiratory volume, COPD: Chronic obstructive pulmonary disease

**Table S3:** Primers used for Real-time PCR

| <b>Gene</b>    | <b>Sequence</b>              |
|----------------|------------------------------|
| <i>IP</i> f    | 5' CACGAGGAGCAAAGCAAGTG 3'   |
| <i>IP</i> r    | 5' AGGTCTGGGCTCTCCAGTCTT 3'  |
| <i>EP4</i> f   | 5'-TGGTATGTGGGCTGGCTG-3'     |
| <i>EP4</i> r   | 5'-GAGGACGGTGGCGAGAAT-3'     |
| <i>EP2</i> f   | 5'-TGCTCCTTGCCTTTCACGA-3'    |
| <i>EP2</i> r   | 5'-TCAGAACAGGAGGCCTAAGGA-3'  |
| <i>GAPDH</i> f | 5' GGGCACCCCTGGGCTAAACTGA 3' |
| <i>GAPDH</i> r | 5' TGCTCTTGCTGGGGCTGGT 3'    |

f: forward, r: reverse

**Table S4: Basal production of cAMP, PGI<sub>2</sub> and PGE<sub>2</sub>**

|                                        | Control patients |   | P    | PH patients |   |
|----------------------------------------|------------------|---|------|-------------|---|
|                                        | levels           | n |      | levels      | n |
| <b>cAMP (pmol/mg protein)</b>          | 0.20±0.04        | 4 | 0.16 | 0.46±0.10   | 7 |
| <b>PGI<sub>2</sub> (ng/μg protein)</b> | 0.026±0.012      | 5 | 0.36 | 0.038±0.007 | 8 |
| <b>PGE<sub>2</sub> (ng/μg protein)</b> | 0.032±0.006      | 5 | 0.95 | 0.033±0.012 | 8 |

The cAMP, PGI<sub>2</sub> (measuring its stable metabolite 6-keto-PGF<sub>1α</sub>) and PGE<sub>2</sub> endogenous levels in human bronchial homogenates were measured by ELISA. Values represent means±SEM from (n) different patients. The statistical differences between preparations derived from control or pulmonary hypertensive (PH) Group-III patients have been tested (Student's t or Mann-Whitney test; P values are shown).
